# Supplementary material for: Synthesis, Characterization, and Environmental Applications of Novel Per-Fluorinated Organic Polymers with Azo- and Azomethine-Based Linkers via Nucleophilic Aromatic Substitution
Source: MDPI journal article supplement (doi:10.3390/polym15204191), 2023-10-23
Supplement: s1 [file s1]

---

# Synthesis, Characterization, and Environmental Applications of Novel Per-Fluorinated Organic Polymers with Azo- and Azo-methine-Based Linkers via Nucleophilic Aromatic Substitution

Suha S. Altarawneh <sup>1,\*</sup>, Hani M. El-Kaderi <sup>2</sup>, Alexander J. Richard <sup>2</sup>, Osama M. Alakayleh <sup>1</sup>, Ibtesam Y. Aljaafreh <sup>1</sup>, Mansour H. Almatarneh <sup>3</sup>, Taher S. Ababneh <sup>4</sup>, Lo'ay A. Al-Momani <sup>5</sup> and Rawan H. Aldalabeeh <sup>1</sup>

<sup>1</sup> Department of Chemistry and Chemical Technology, Tafila Technical University, Tafila 66110, Jordan; osama.m.alakayleh@gmail.com (O.M.A.); ibtesam\_aljaafreh@ttu.edu.jo (I.Y.A.); rawan.hanidalabeeh@gmail.com (R.H.A.)

<sup>2</sup> Department of Chemistry, Virginia Commonwealth University, Richmond, VA 23284, USA; helkaderi@vcu.edu (H.M.E.-K.); richardaj@vcu.edu (A.J.R.)

<sup>3</sup> Department of Chemistry, University of Jordan, Amman 11942, Jordan; m.almatarneh@ju.edu.jo

<sup>4</sup> Department of Chemistry, Yarmouk University, Irbid 21163, Jordan; ababnehtaher@hotmail.com

<sup>5</sup> Department of Chemistry, Faculty of Science, The Hashemite University, Zarqa 13133, Jordan; loay.al-momni@hu.edu.jo

\* Correspondence: s.tarawneh@ttu.edu.jo

| Title                                                                                       | Page # |
|---------------------------------------------------------------------------------------------|--------|
| <b>Part S1:</b>                                                                             |        |
| Scheme S1: Proposed mechanism of the nucleophilic aromatic substitution reaction (NAS).     | 2      |
| Table S1: Reported values of the chemical shift of <sup>19</sup> F NMR and different sites. | 2      |
| Figures S1–S4: <sup>1</sup> H and <sup>13</sup> C NMR Spectra of the monomers.              | 3–6    |
| Figures S5–S12: <sup>1</sup> H and <sup>13</sup> C NMR Spectra of the polymers.             | 7–13   |
| Figure S13: Solubility behavior of the polymers in THF and DMSO.                            | 14     |
| Figure S14: SEM images of the polymers.                                                     | 14     |
| Figure S15: Proposed sites of zero and non-zero dipole moments of the polymers.             | 15     |
| <b>Part S2:</b>                                                                             |        |
| BET surface area determination.                                                             | 15–16  |
| Table S3: BET plots data of the polymers.                                                   |        |
| References                                                                                  | 16     |

---

**(A) Ortho-substitution**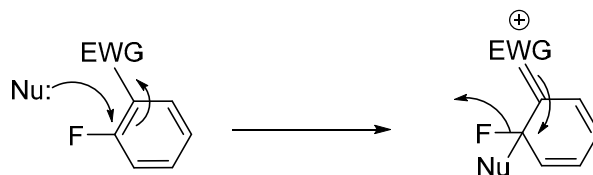**(B) Para -substitution**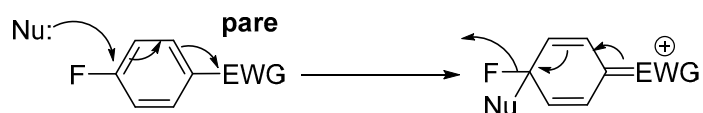

EWG: Electron withdrawing group  $\text{NO}_2$ , Cl, Br, F, I .....etc

**Scheme S1.** Proposed mechanism of the nucleophilic aromatic substitution reaction (NAS).

**Table S1.** Reported values of the chemical shift of  $^{19}\text{F}$ -NMR and different sites [1].

| Compound                    | Chemical Shift (ppm) |
|-----------------------------|----------------------|
| Benzene + Hexafluorobenzene | -163.2               |
| Monofluorobenzene           | -112.9               |
| 1,2-Difluorobenzene         | -138.4               |
| 1,3-Difluorobenzene         | -109.9               |
| 1,4-Difluorobenzene         | -119.6               |
|                             | -143.5               |
| 1,2,4-Trifluorobenzene      | -133.5               |
|                             | -115.7               |
| 1,2,4,5-Tetrafluorobenzene  | -139.7               |
|                             | -162.5               |
| Pentafluorobenzene          | -154.2               |
|                             | -139.2               |

List of  $^1\text{H}$ - and  $^{13}\text{C}$ -NMR Spectra of the monomers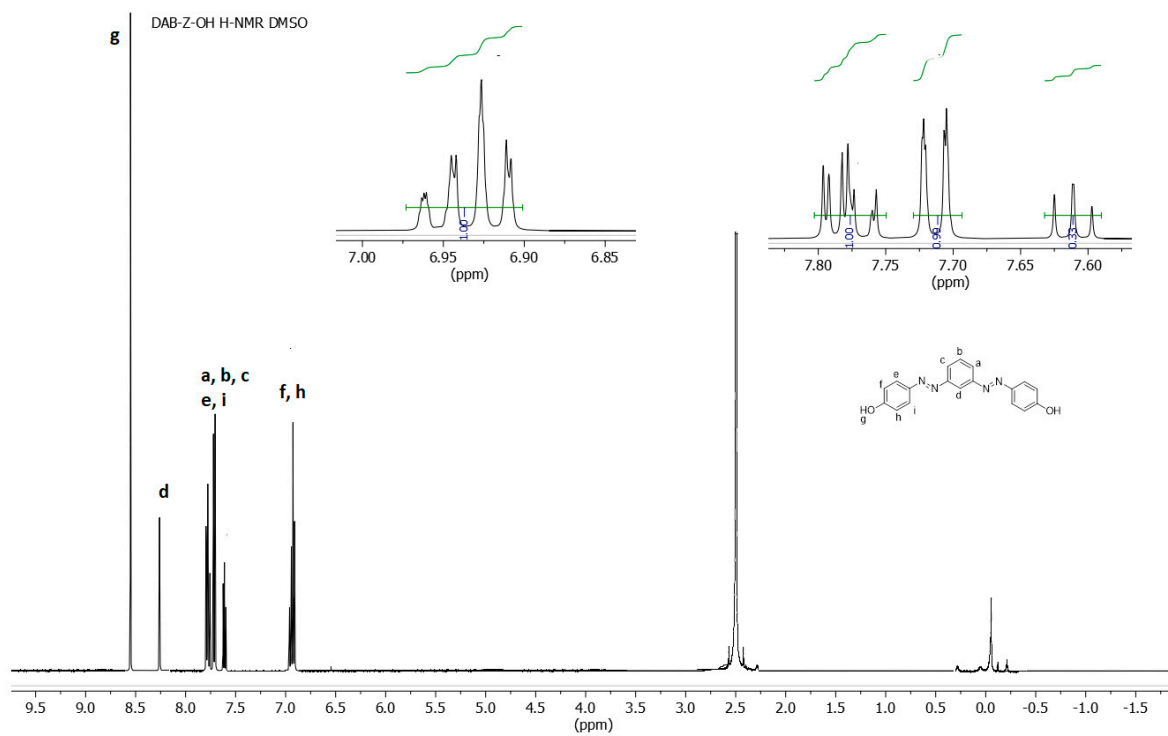**Figure S1.**  $^1\text{H}$  NMR spectra of DAB-Z-OH.

DAB-Z-OH  
C13CPD DMSO

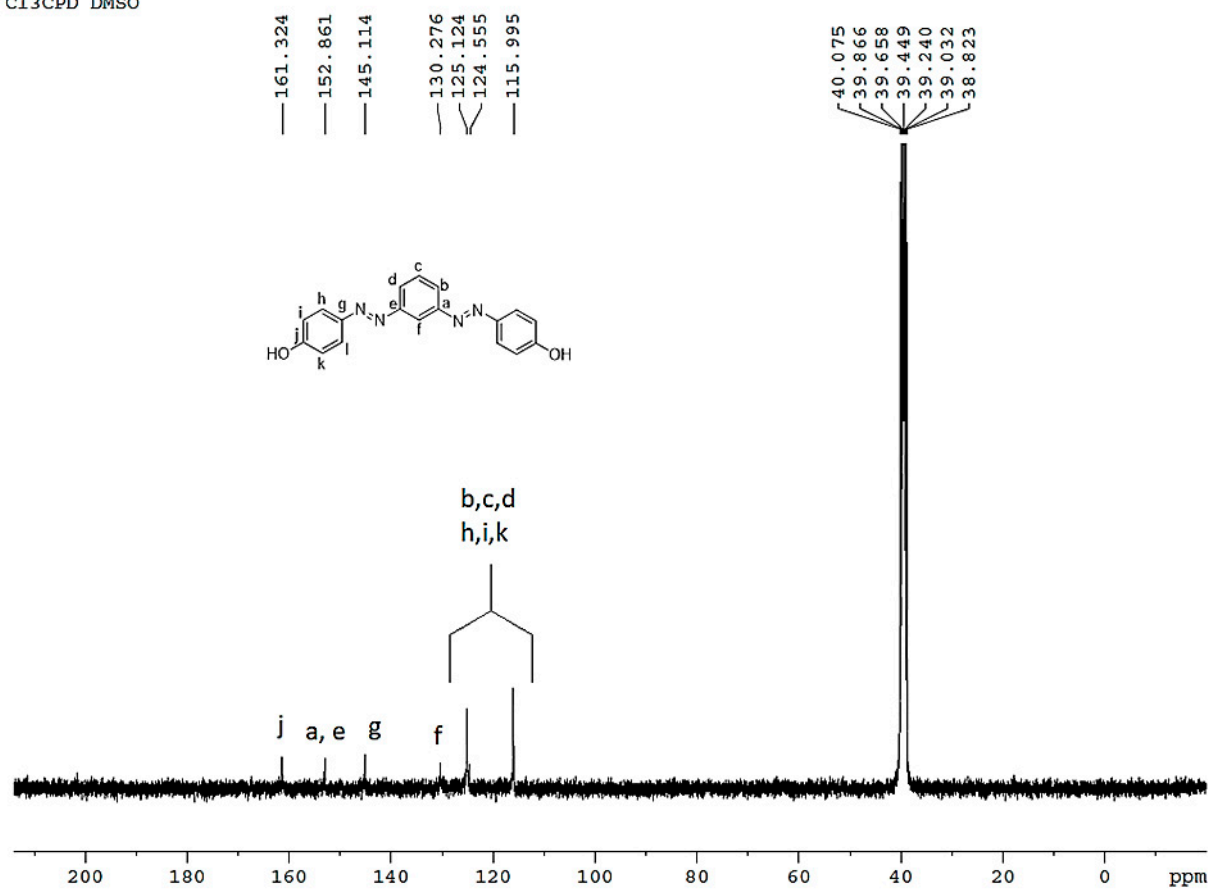

Figure S2. <sup>13</sup>C NMR spectra of DAB-Z-OH.

DAB-A-OH  
PROTON DMSO

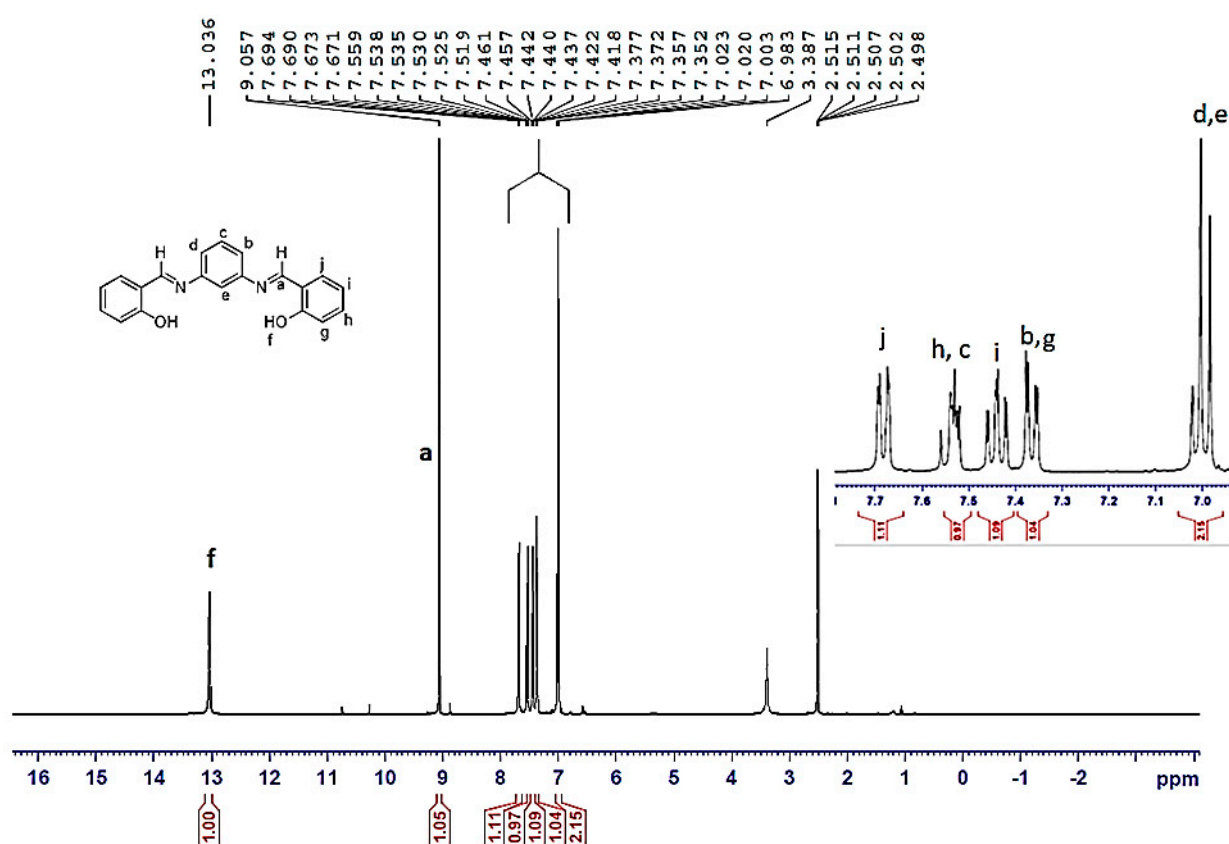

Figure S3.  $^1\text{H}$  NMR spectra of DAB-A-OH.

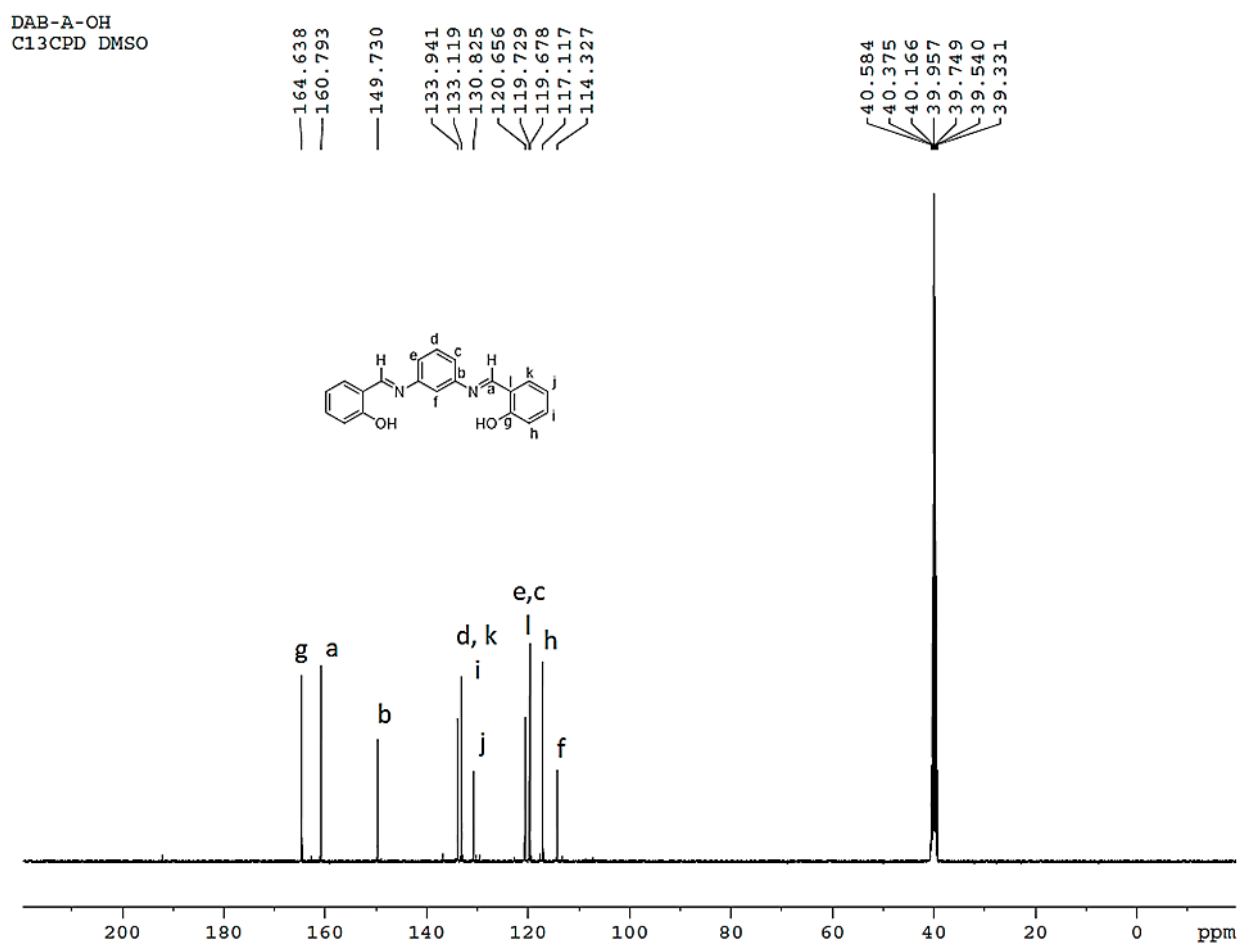

Figure S4.  $^{13}\text{C}$  NMR spectra of DAB-A-OH.

$^1\text{H}$  and  $^{13}\text{C}$  NMR Spectra of the Polymers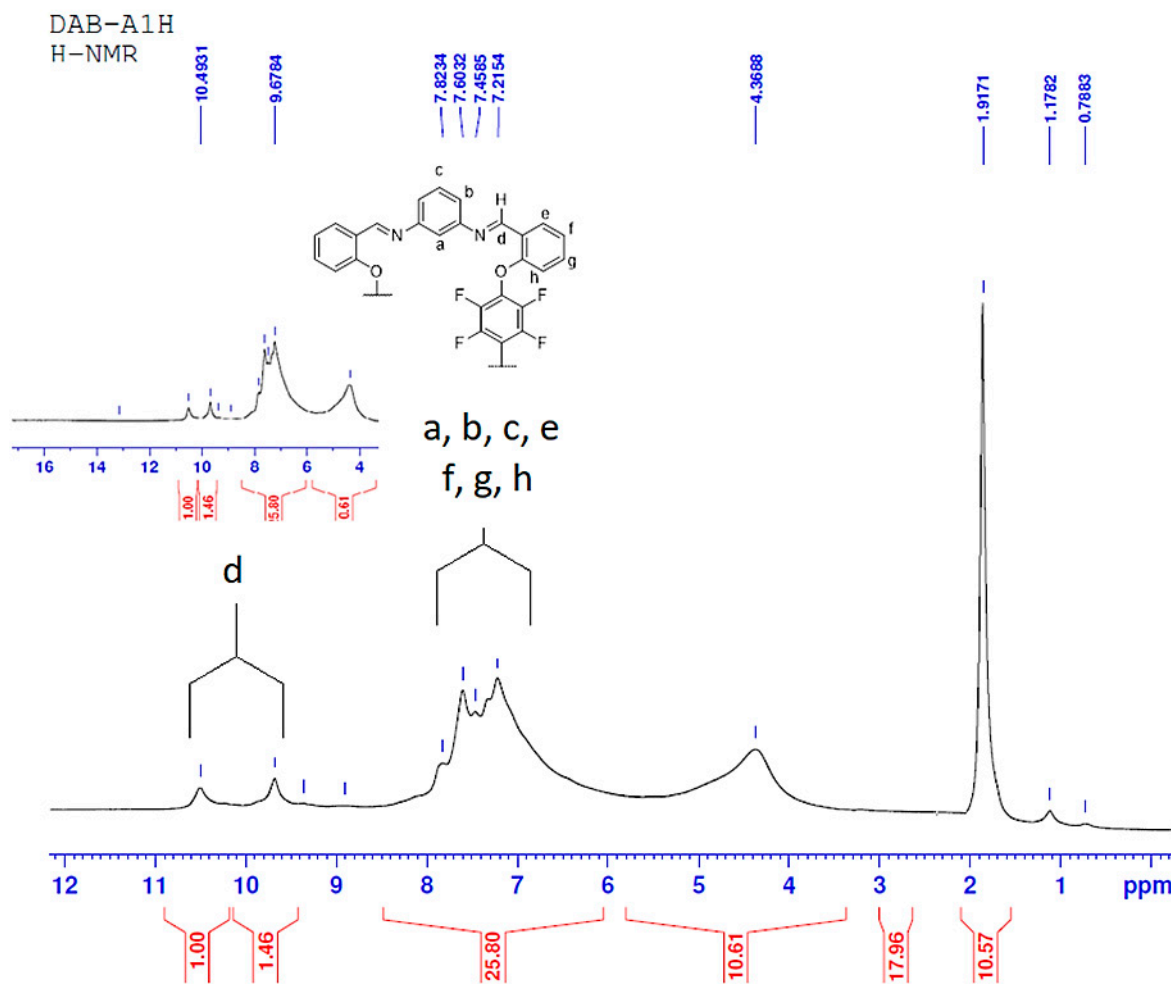Figure S5.  $^1\text{H}$  NMR spectra of DAB-A-1h.

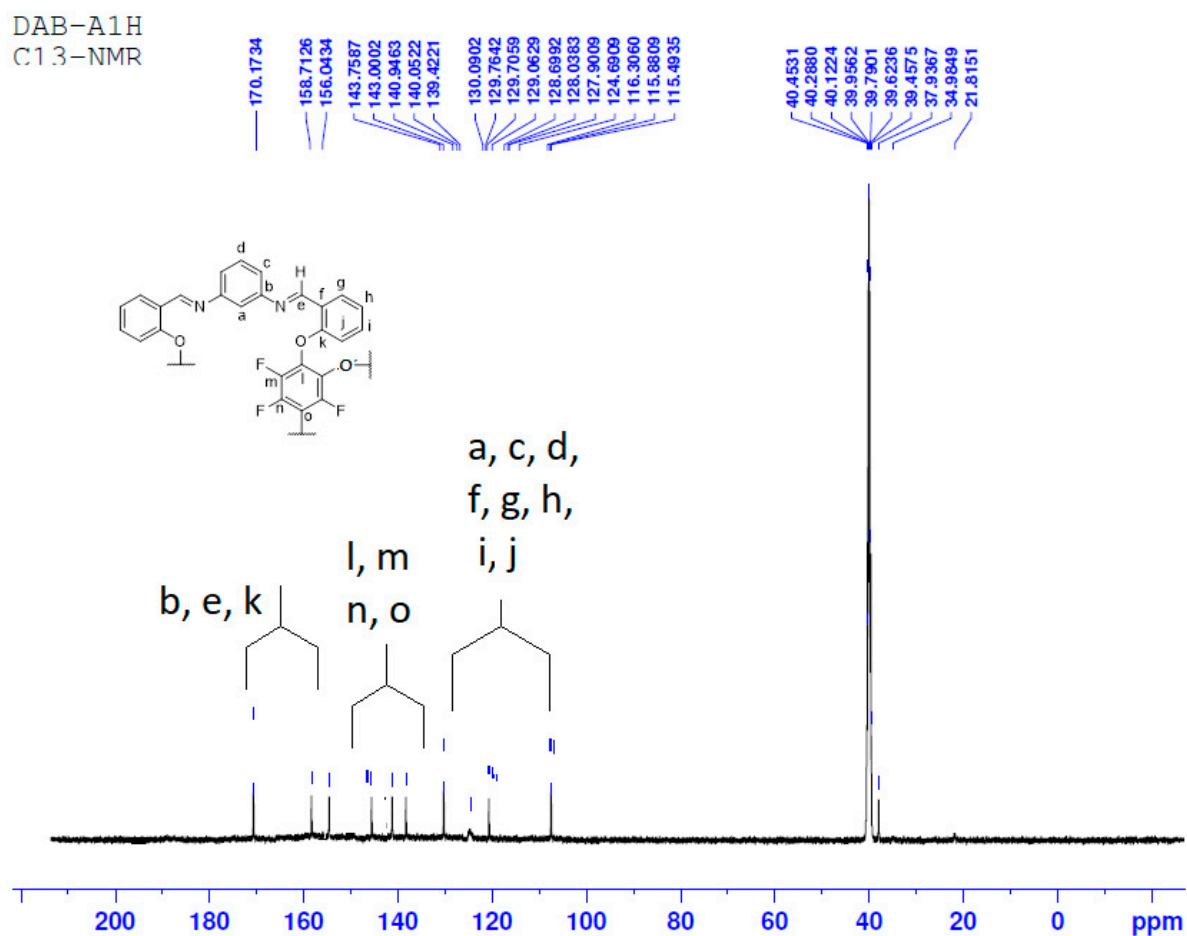

Figure S6.  $^{13}\text{C}$  NMR spectra of DAB-A-1h.

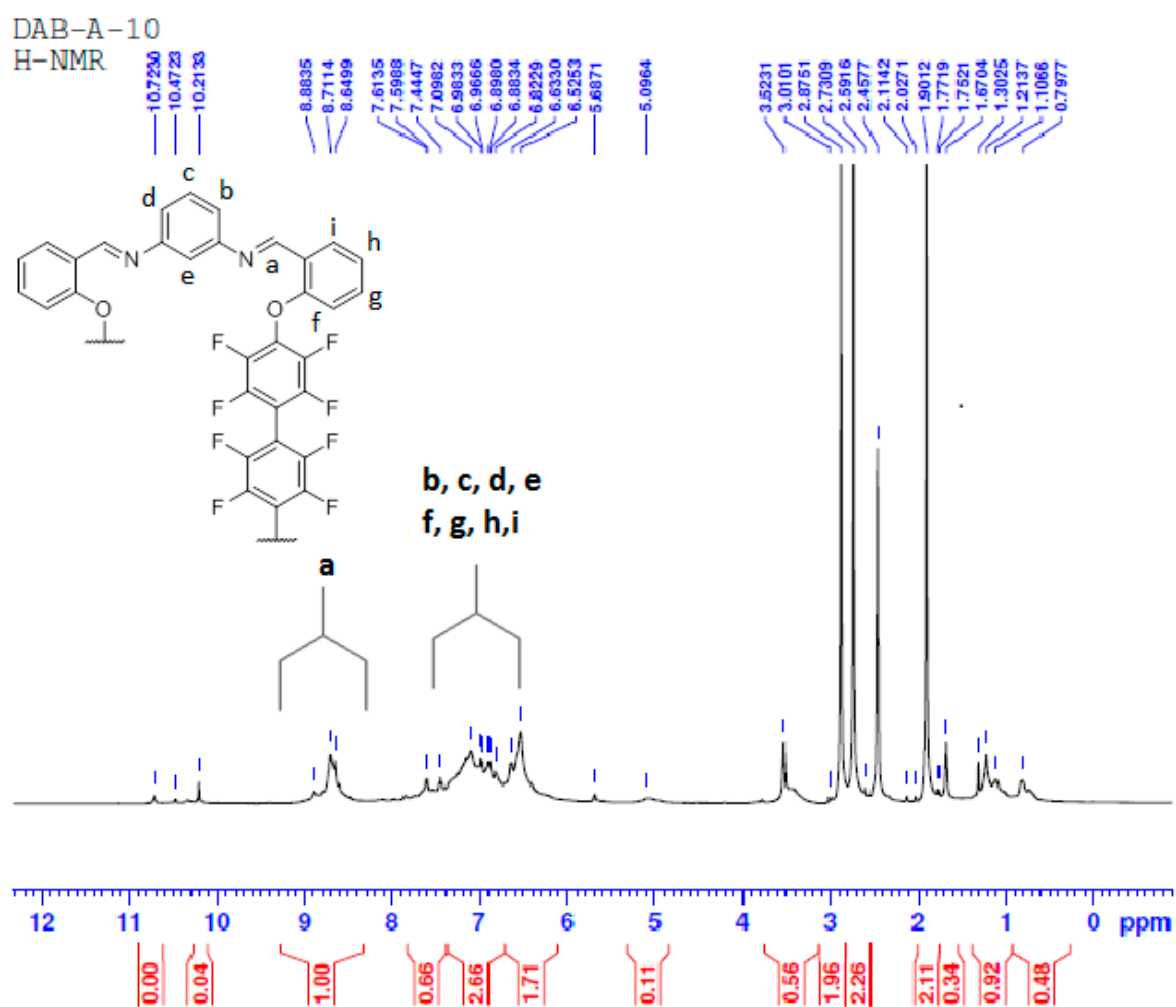

Figure S7.  $^1\text{H}$  NMR spectra of DAB-A-10.

DAB-A-10  
C13-NMR

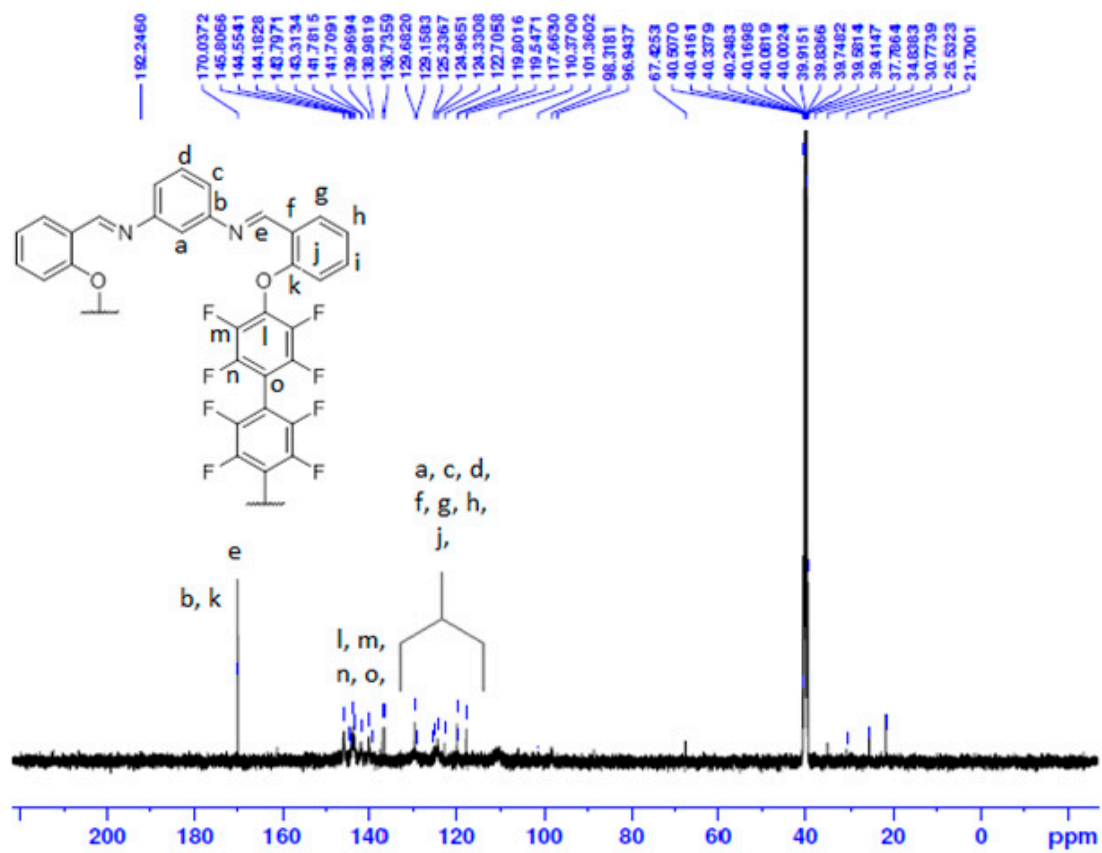

Figure S8. <sup>13</sup>C NMR spectra of DAB-A-10.

DAB-Z-1h  
H-NMR

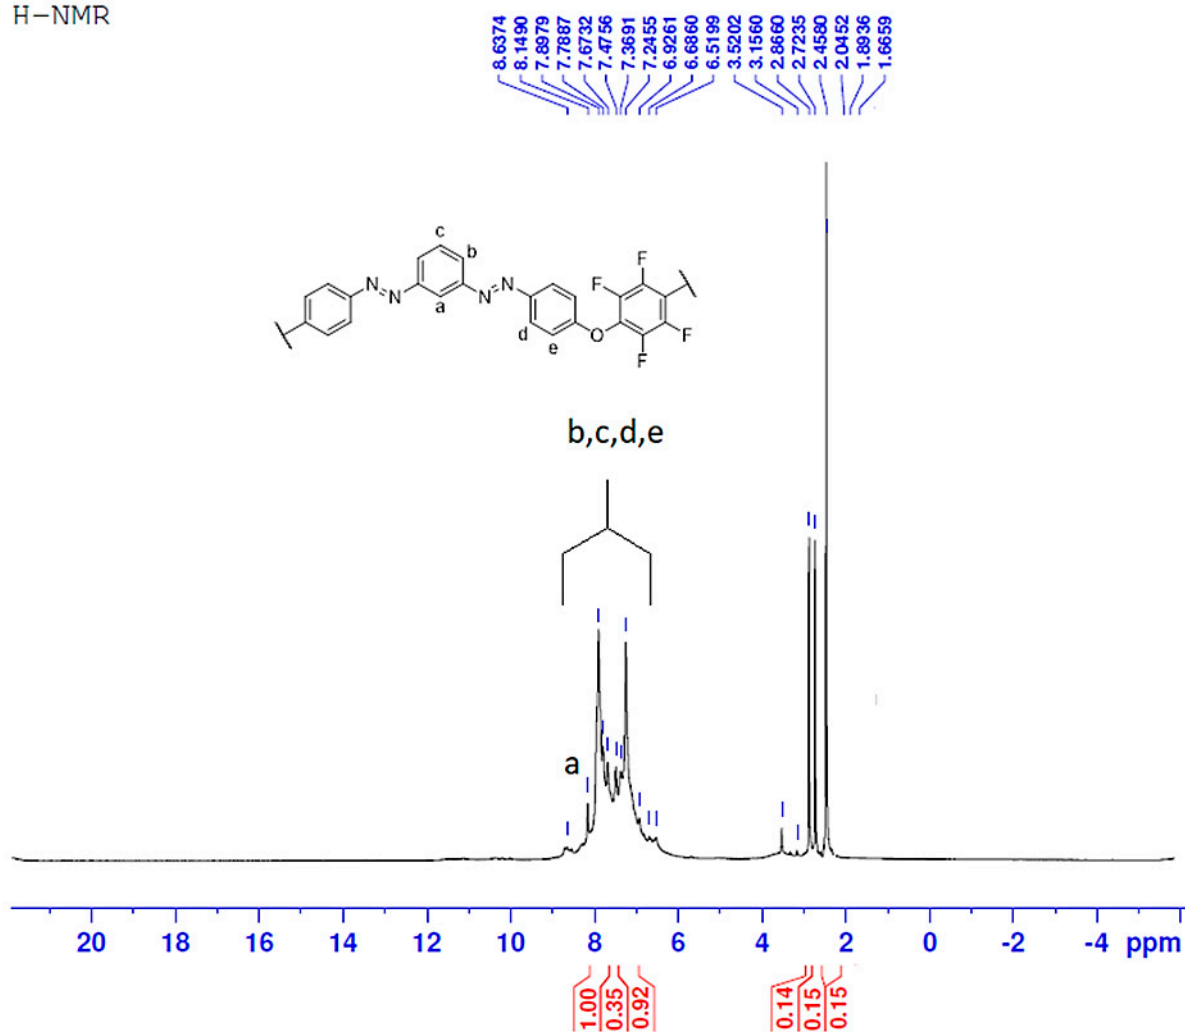

Figure S9.  $^1\text{H}$  NMR spectra of DAB-Z-1h.

DAB-Z-1h  
C13-NMR

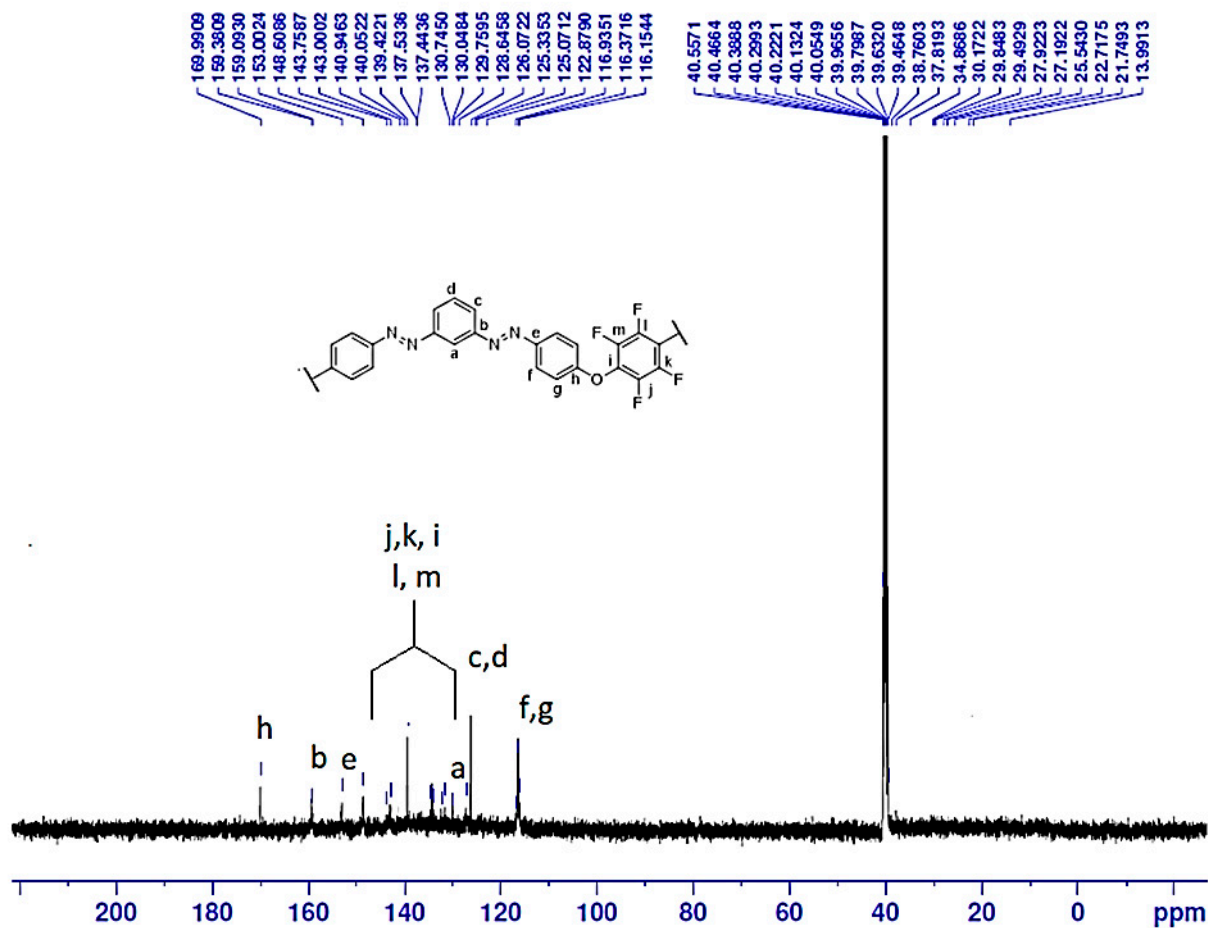

Figure S10.  $^{13}\text{C}$  NMR spectra of DAB-Z-1h.

DAB-Z-10  
H-NMR

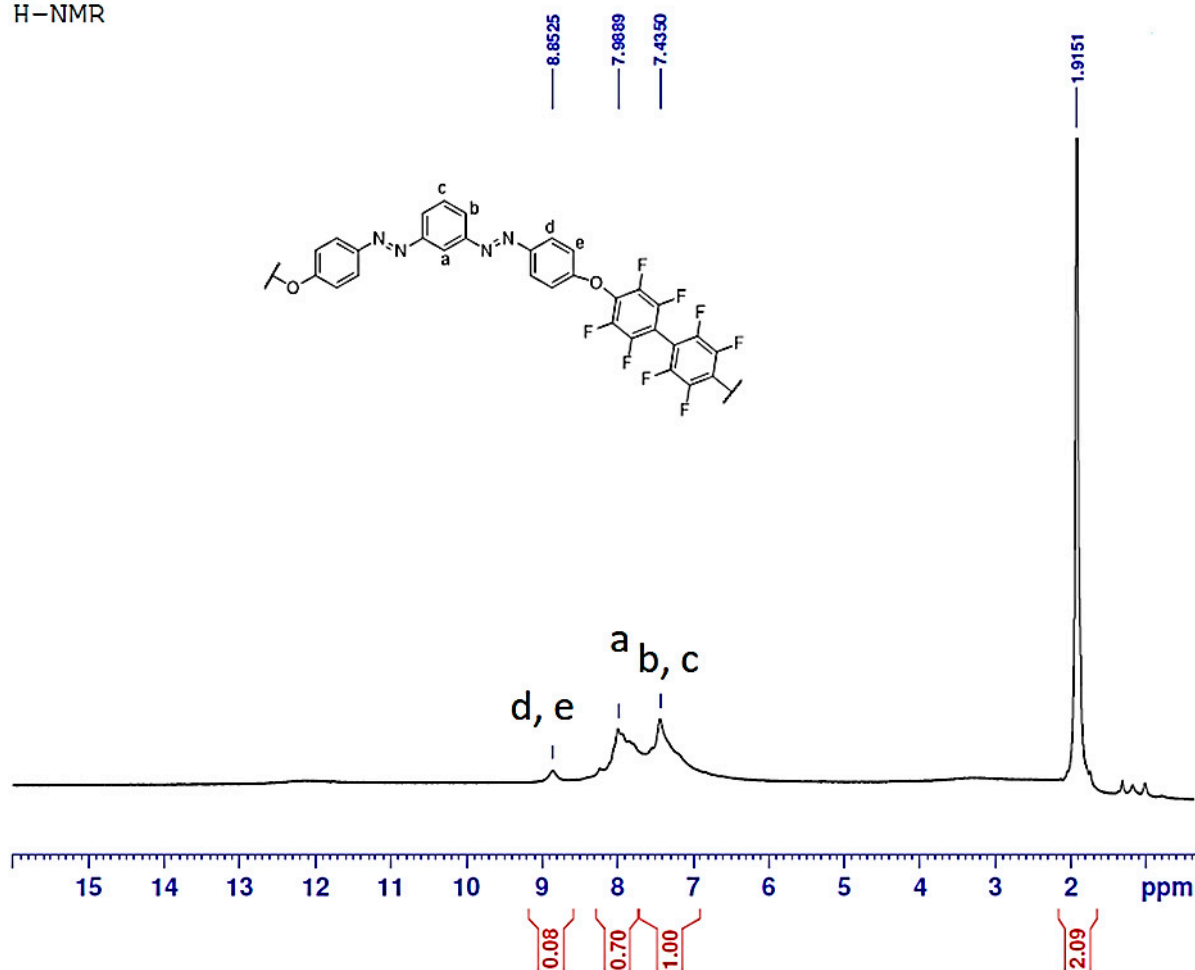

Figure S11.  $^1\text{H}$  NMR spectra of DAB-Z-10.

DAB-Z-10  
C13-NMR

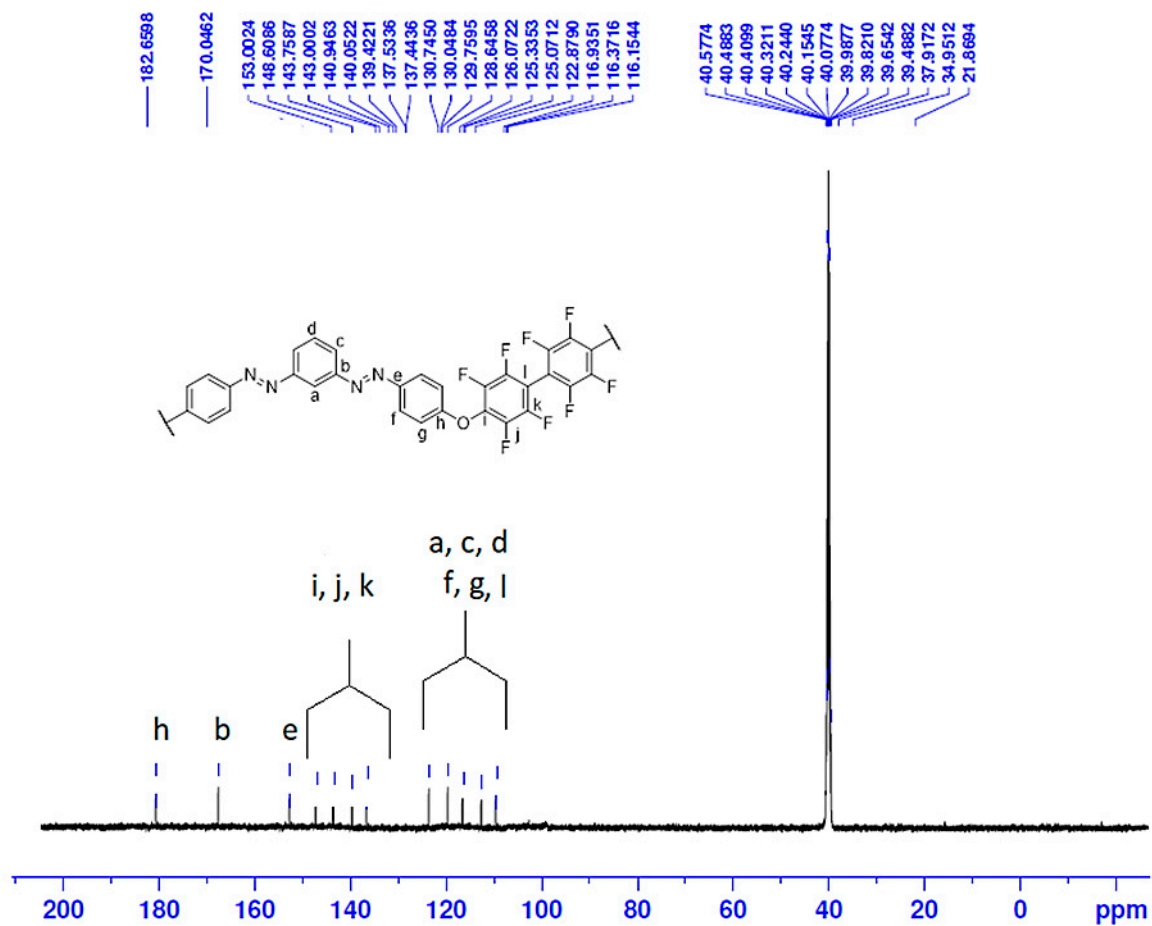

Figure S12.  $^{13}\text{C}$  NMR spectra of DAB-Z-10.

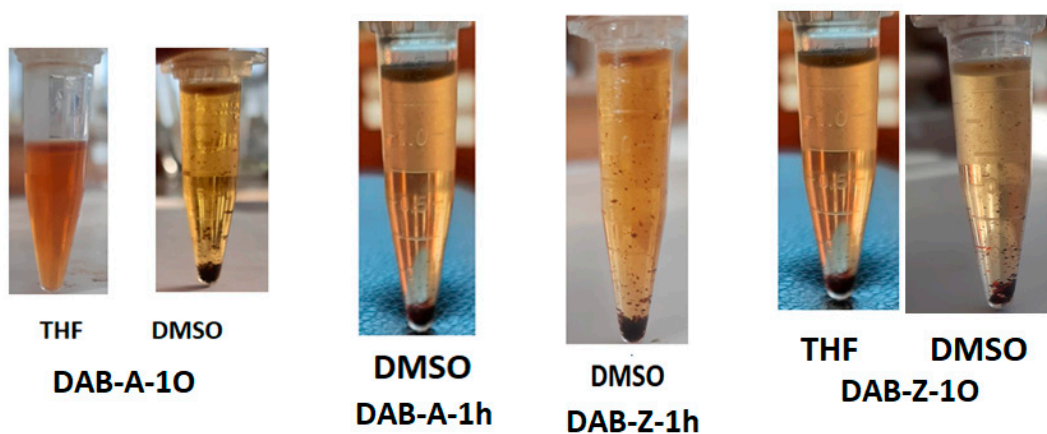

**Figure S13.** Solubility behavior of the polymers in THF and DMSO. (Note: DAB-A-1h, DAB-Z-1h were completely insoluble in THF).

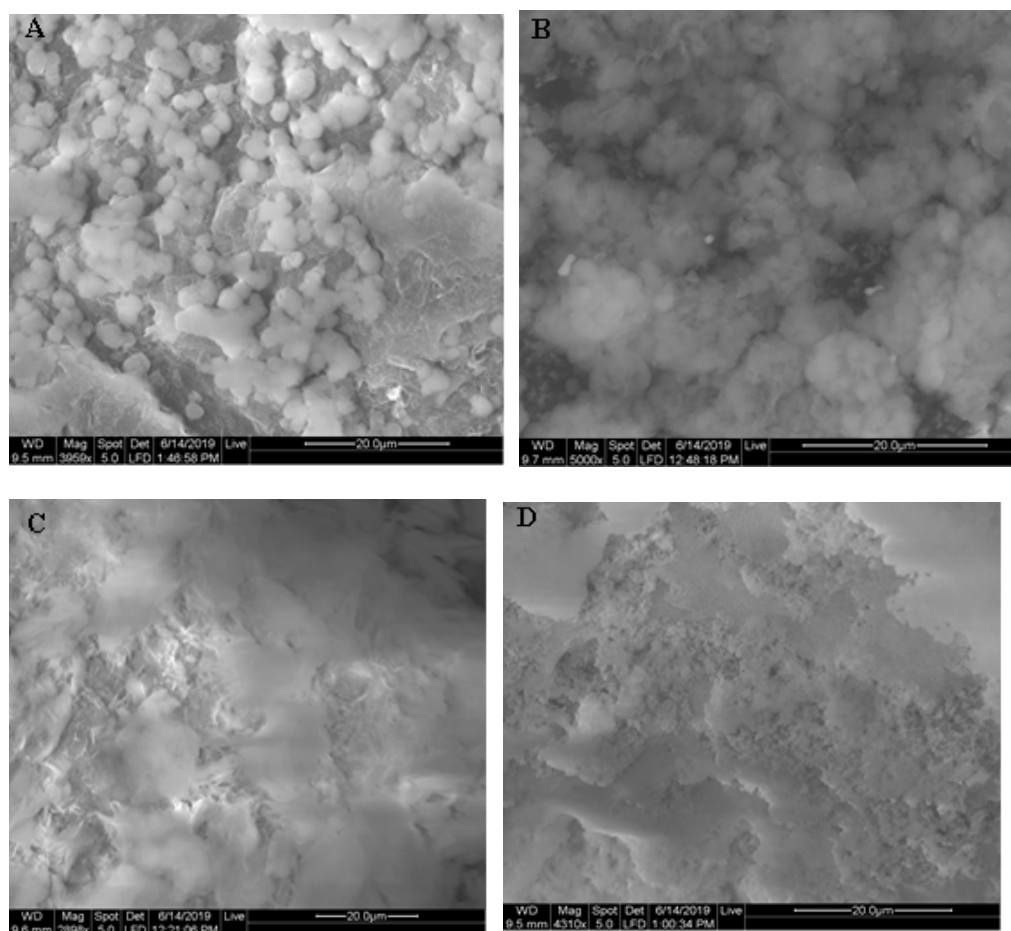

**Figure S14.** The SEM of polymers: (A) DAB-Z-10, (B) DAB-Z-1h (C) DAB-A-10. and (D) DAB-A-1h.

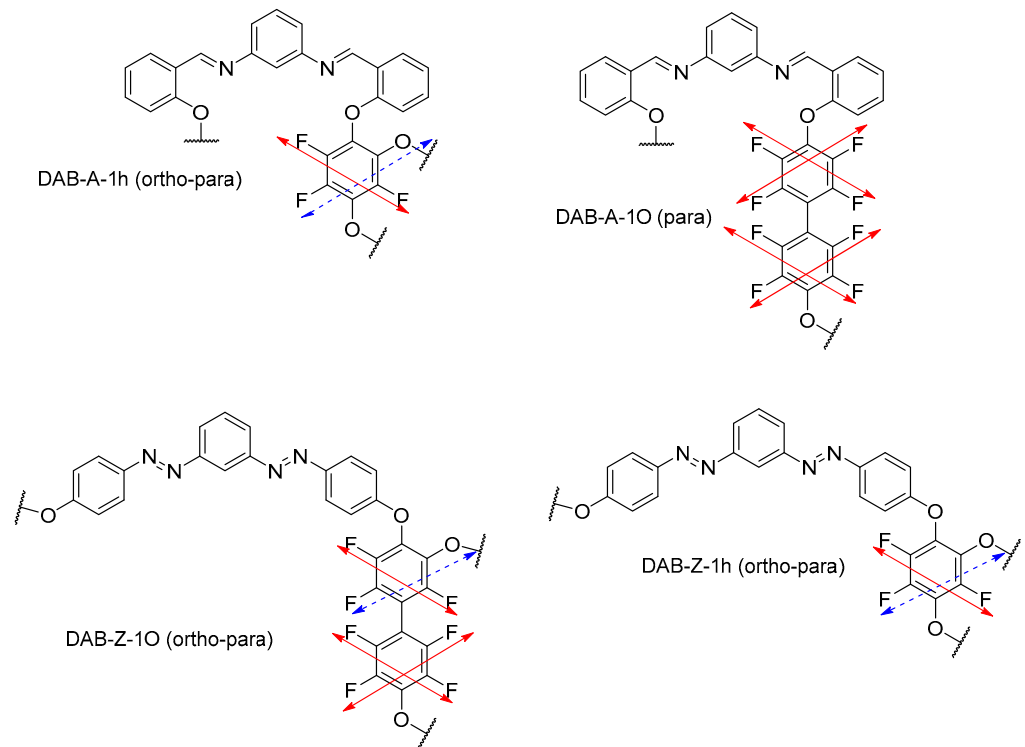

**Figure S15.** Proposed sites of zero and non-zero dipole moments of the polymers; (bold arrow create  $\mu = 0$ , dashed arrow creates  $\mu > 0$ ).

### Part S2: BET surface area calculations

The BET surface area of the polymers was determined by using Multi-point BET plot by using eq (1), where  $X_m$  is the monolayer capacity,  $P/P_0$  relative pressure, and  $C$  is constant. The plot of  $\frac{1}{x[(\frac{p_0}{p})-1]}$  Vs  $(\frac{P}{P_0})$  is performed by using, at minimum, three data points, in the  $P/P_0$  range 0.025 to 0.30, which should give a linear relation with a positive slope. It is well-known that at relative pressures higher than 0.5, there is the onset of capillary condensation, and at relatively low pressures only a monolayer gas adsorption occurs. gives liners plot with positive slope.

$$\frac{1}{x[(\frac{p_0}{p})-1]} = \frac{1}{X_m C} + \left(\frac{C-1}{X_m C}\right) * \left(\frac{P}{P_0}\right) \quad (1)$$

When the values of the slope and y-intercept is determined by using least squares regression, the monolayer capacity  $X_m$  can be calculated by applying Equation (2).

$$X_m = \left( \frac{1}{\text{slope}(s) + \text{intercept}(i)} \right) \quad (2)$$

Once  $X_m$  is determined, the total surface area **SA** can be calculated from eq (3), where **Av** is Avogadro's number ( $6.022 * 10^{23}$ ), **Am** is the cross sectional area of the adsorbate and equals  $0.138 \text{ nm}^2$  for an absorbed argon molecule, and **Mv** is the molar volume, which equals  $22414 \text{ mL}$  as STP conditions.

$$SA \left( \frac{m^2}{g} \right) = \left[ \frac{X_m \frac{cc}{g} * Am (nm^2) * Av}{22414 cc} \right] \quad (3)$$

According to the above equations, the calculated  $X_m$  and SA values along with the slope, and intercepts of the plots are summarized in table S3 [2-4].

**Table S3.** BET plots data of the polymers.

| Equation                | $y = a + b \cdot x$ |             |             |             |
|-------------------------|---------------------|-------------|-------------|-------------|
| Plot                    | DAB-A-1O            | DAB-A-1h    | DAB-Z-1h    | DAB-Z-1O    |
| Weight                  | No Weighting        |             |             |             |
| Intercept (i)           | -4.58E-09           | -2.795E-09  | -2.677E-09  | -1.678E-09  |
| Slope (s)               | 0.0129972           | 0.0091831   | 0.0075039   | 0.0048092   |
| $X_m=1/(s+i)$           | 76.93967565         | 108.895722  | 133.2640836 | 207.9348642 |
| SA (surface area)       | 285.2665312         | 403.7488409 | 494.0985588 | 770.9527876 |
| Residual Sum of Squares | 3.61E-05            | 1.99E-05    | 1.12E-05    | 4.99E-06    |
| Pearson's r             | 0.994560004         | 0.99375191  | 0.994836658 | 0.994574501 |
| R-Square (COD)          | 0.989149602         | 0.987542859 | 0.989699976 | 0.989178439 |
| Adj. R-Square           | 0.986437003         | 0.984428574 | 0.98712497  | 0.986473049 |

## References

1. Kaseman, D. C.; Janicke, M. T.; Frankle, R. K.; Nelson, T.; Angles-Tamayo, G.; Batrice, R. J.; Magnelind, P. E.; Espy, M. A.; and Williams, R. F. Chemical Analysis of Fluorobenzenes via Multinuclear Detection in the Strong Heteronuclear J-Coupling Regime. *Appl. Sci* **2020**, 10, 3836
2. Bae, Y.-S.; Yazaydin, A.Ö.; and Snurr, R.Q. Evaluation of the BET Method for Determining Surface Areas of MOFs and Zeolites that Contain Ultra-Micropores. *Langmuir* **2010**, 26, 5475-5483.
3. Merukan Chola, N.; Gajera, P.; Kulkarni, H.; Kumar, G.; Parmar, R.; Nagarale, R. K.; and Sethia, G. Sorption of Carbon Dioxide and Nitrogen on Porous Hyper-Cross-Linked Aromatic Polymers: Effect of Textural Properties, Composition, and Electrostatic Interactions. *ACS Omega* **2023**, 8, 28, 24761–24772
4. Shi, K.; Li, Z.; Anstine, D. M.; Tang, D.; Colina, C. M.; Sholl, D. S.; Siepmann, J. I.; and Snurr, R. Q. Two-Dimensional Energy Histograms as Features for Machine Learning to Predict Adsorption in Diverse Nanoporous Materials. *J. Chem. Theory Comput* **2023**, 19, 14, 4568–4583.
